# Supplementary material for: A fast and general approach to produce a carbon coated Janus metal/oxide hybrid for catalytic water splitting
Source: Royal Society of Chemistry journal article supplement (doi:10.1039/d0ta12021a), 2021-01-01
Supplement: d0ta12021a1.pdf [file d0ta12021a1.pdf]

## Supplementary Information

### **A fast and general approach to carbon coated Janus metal/oxide hybrid for catalytic water splitting**

Guoge Zhang,<sup>\*a</sup> Xuewang Huang,<sup>a</sup> Xiao Ma,<sup>a</sup> Yan Liu,<sup>b</sup> Yiran Ying,<sup>c</sup> Xuyun Guo,<sup>c</sup> Nianqing Fu,<sup>a</sup> Fei Yu,<sup>a</sup> Huijun Wu,<sup>d</sup> Ye Zhu,<sup>c</sup> and Haitao Huang<sup>\*c</sup>

<sup>a</sup> School of Materials Science and Engineering, South China University of Technology, 381 Wushan Road, Guangzhou, 510641, P. R. China

<sup>b</sup> School of Chemical Engineering and Technology, Sun Yat-sen University, Zhuhai, 519082, P. R. China

<sup>c</sup> Department of Applied Physics, The Hong Kong Polytechnic University, 11 Yuk Choi Road, Hung Hom, Hong Kong, China

<sup>d</sup> School of Civil Engineering, Guangzhou University, 230 Wai Huan Xi Road, Guangzhou, 510006, P. R. China

† Corresponding Authors: ggzhang@scut.edu.cn; aphhuang@polyu.edu.hk.

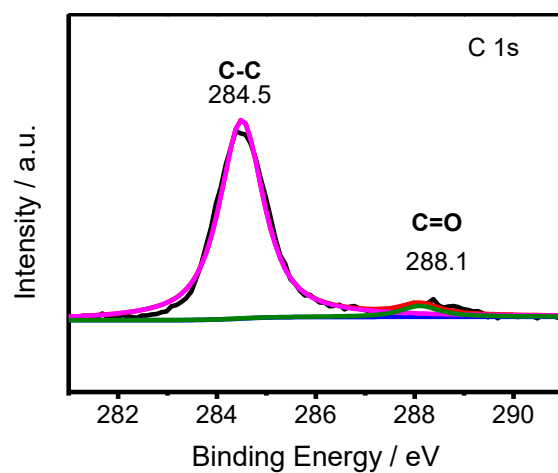

**Figure S1.** XPS spectra of C 1s for CoMo/CoMoO<sub>x</sub>.

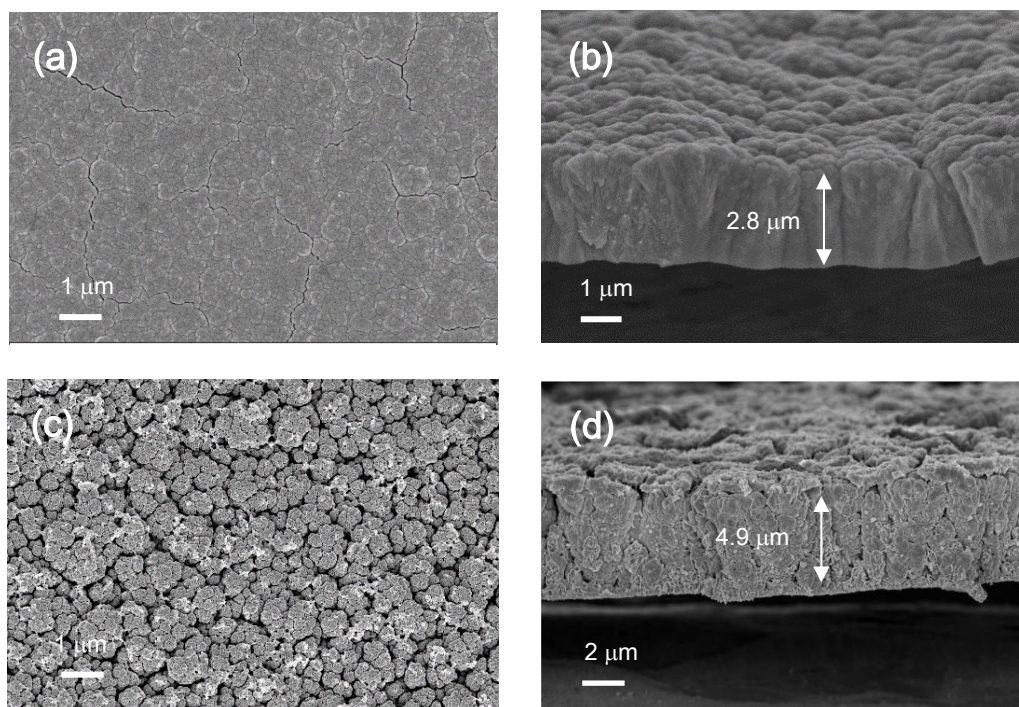

**Figure S2.** SEM images of (a, b) CoMo and (c, d) CoMo/CoMoO<sub>x</sub>.

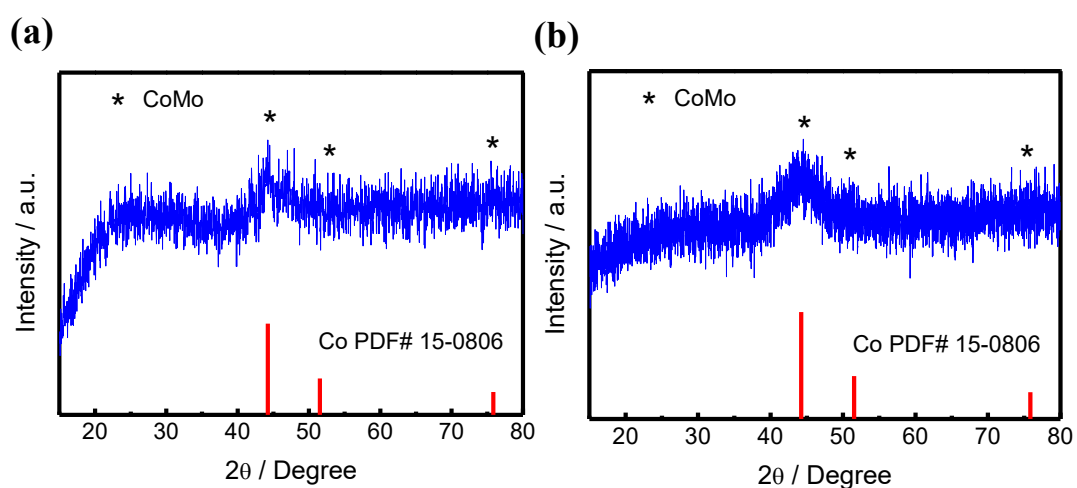

**Figure S3.** XRD patterns of (a) CoMo/CoMoO<sub>x</sub> and (b) CoMo.

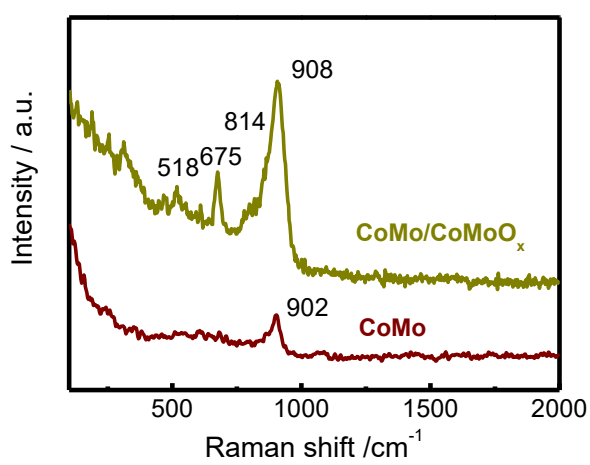

**Figure S4.** Raman spectra of CoMo/CoMoO<sub>x</sub> and CoMo.

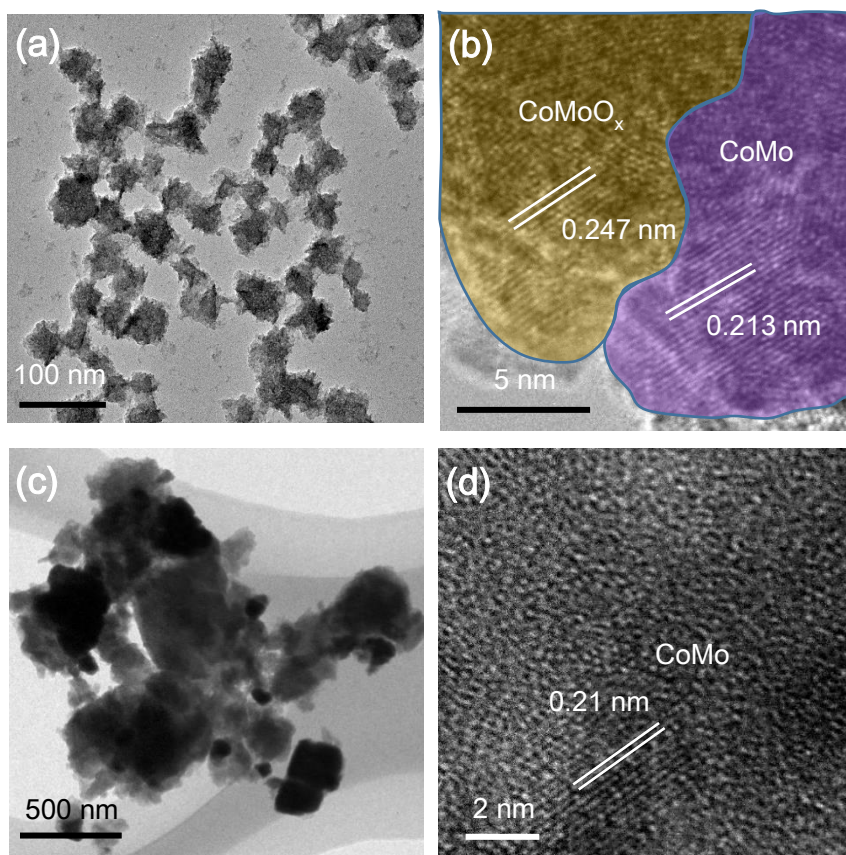

**Figure S5.** (a) Low magnification TEM image and (b) HRTEM image for CoMo/CoMoO<sub>x</sub>. (c) Low magnification TEM image and (d) HRTEM image for CoMo.

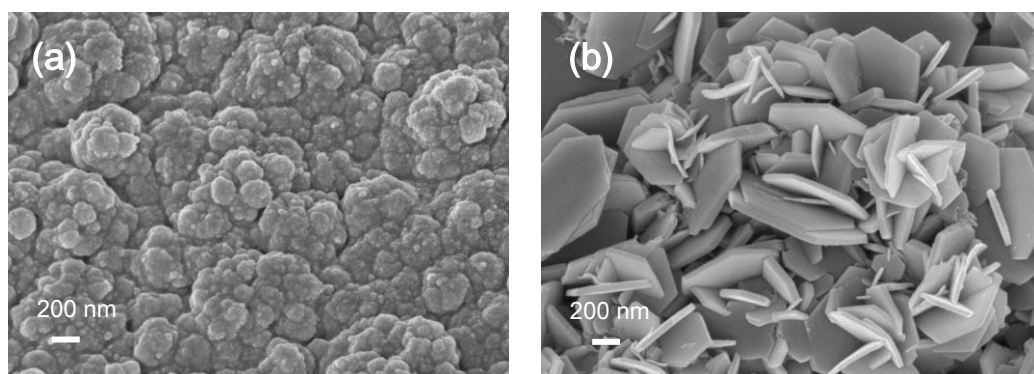

**Figure S6.** SEM images of (a) CoMo/CoMoO<sub>x</sub>@C and (b) CoMo/CoMoO<sub>x</sub> after stability test.

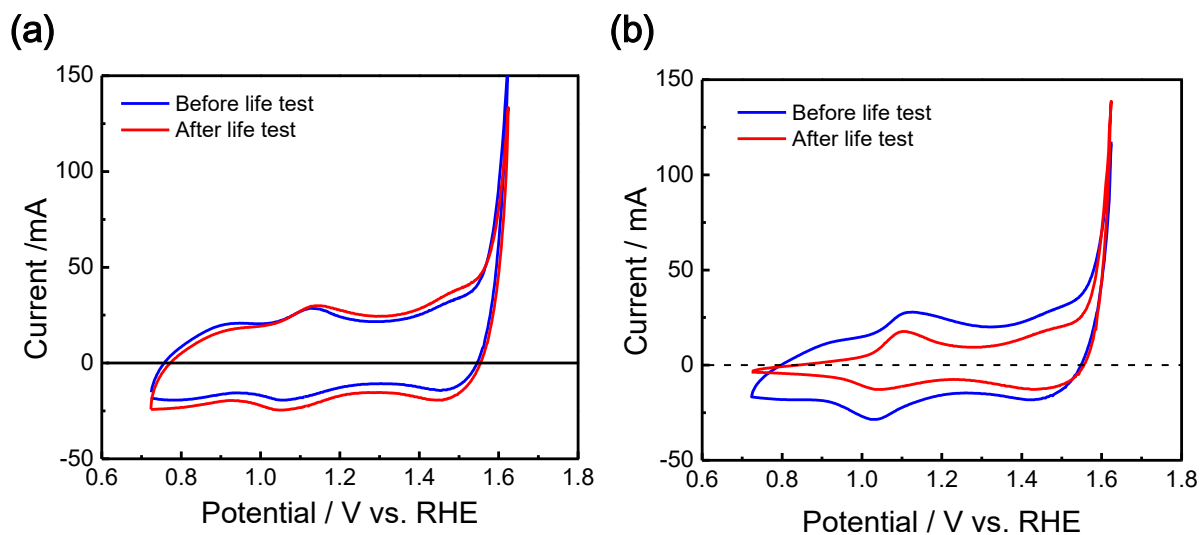

**Figure S7.** CV curves of (a) CoMo/CoMoO<sub>x</sub>@C and (b) CoMo/CoMoO<sub>x</sub> recorded in 1M KOH at a scan rate of 100 mV s<sup>-1</sup>.

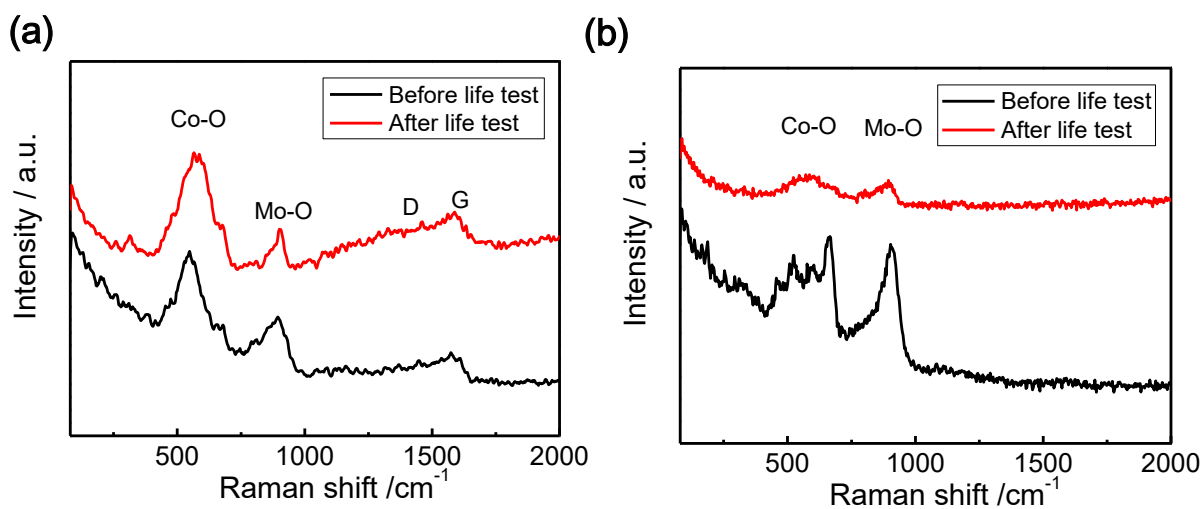

**Figure S8.** Raman spectra of (a) CoMo/CoMoO<sub>x</sub>@C and (b) CoMo/CoMoO<sub>x</sub>.

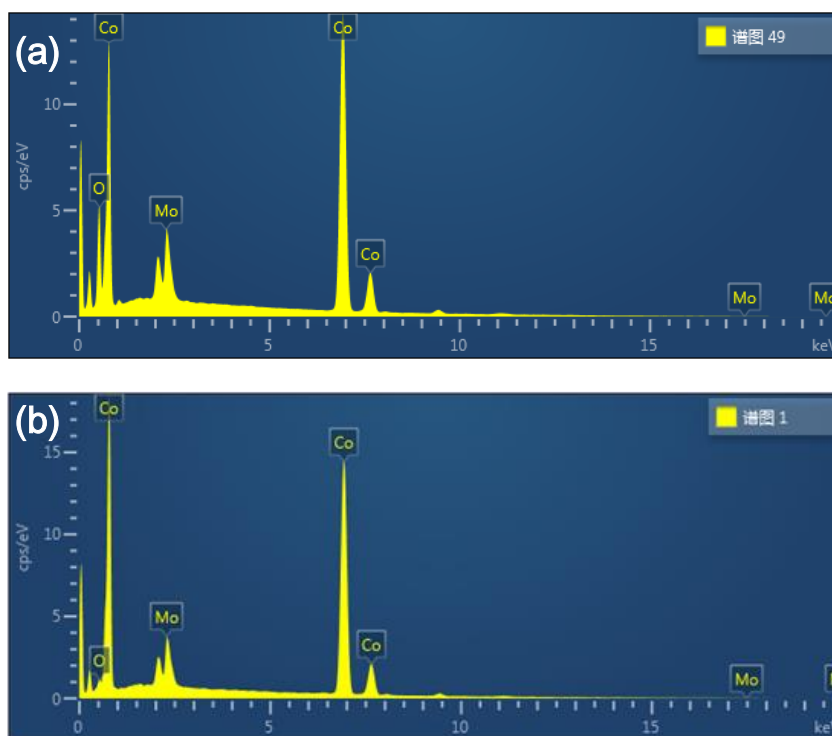

**Figure S9.** Energy dispersive X-ray (EDX) spectra of CoMo/CoMoO<sub>x</sub> (a) before and (b) after stability test.

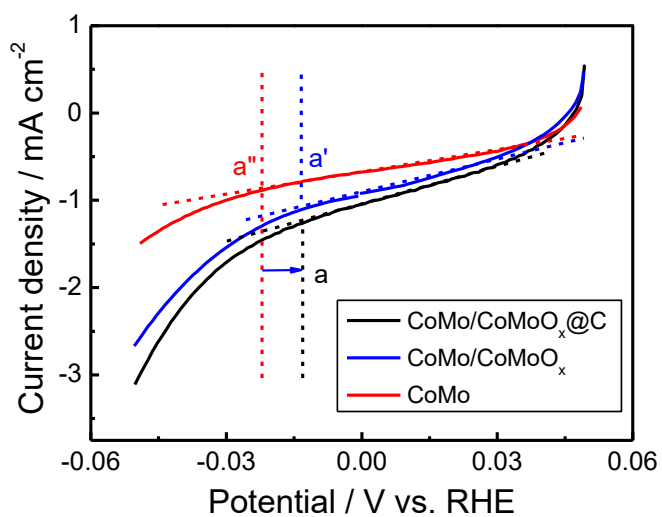

**Figure S10.** LSV curves measured in 1 M KOH at a scan rate of 1 mV s<sup>-1</sup>. Symbols a, a' and a'' refer to the onset potential of hydrogen adsorption.

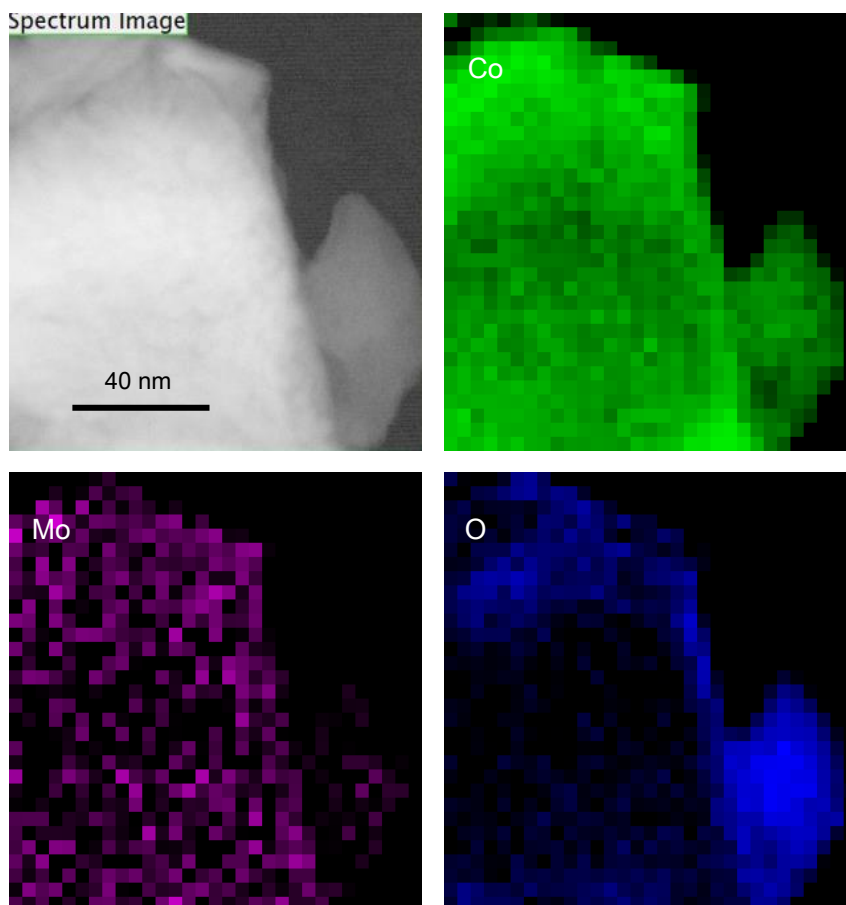

**Figure S11.** Elemental mapping images of CoMo obtained by normal cathodic deposition at  $20 \text{ mA cm}^{-2}$  without plasma arcing.

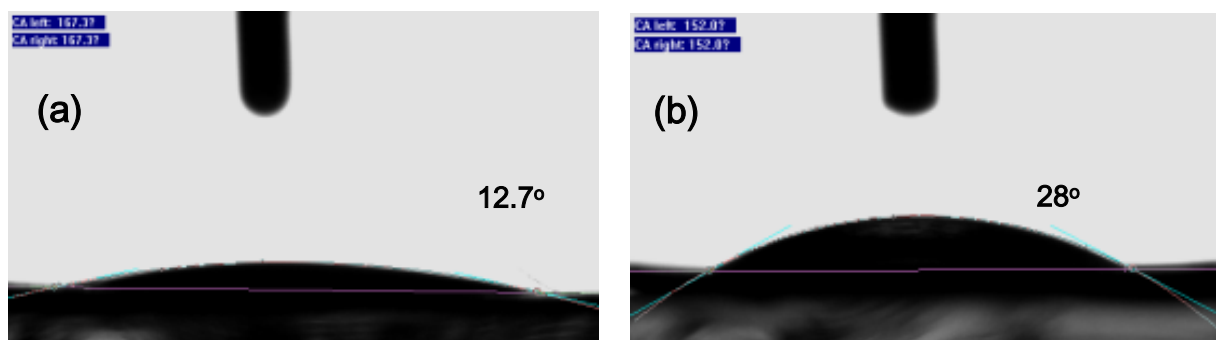

**Figure S12.** Contact angle of (a) CoMo/CoMoO<sub>x</sub>@C and (b) CoMo/CoMoO<sub>x</sub>.

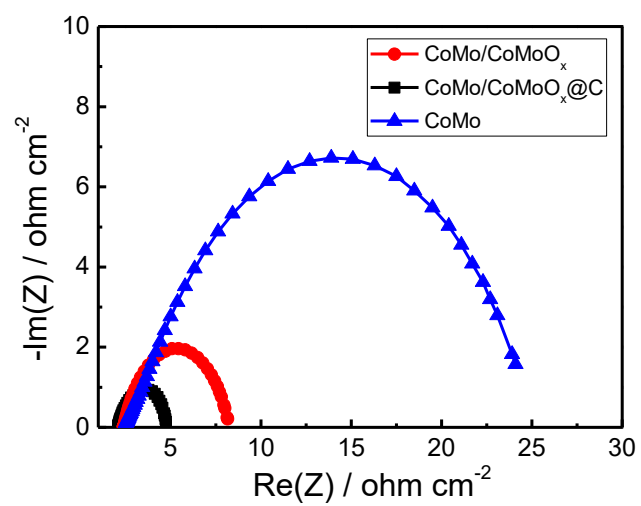

**Figure S13.** Nyquist plots obtained at an HER overpotential of 80 mV in 1 M KOH.

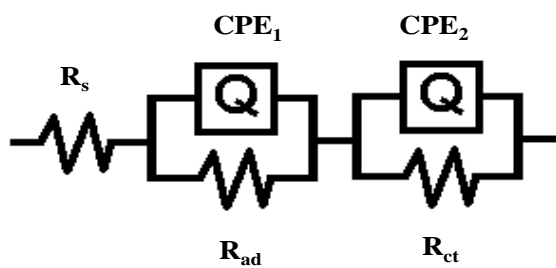

**Figure S14.** Equivalent circuit used to fit the EIS data.



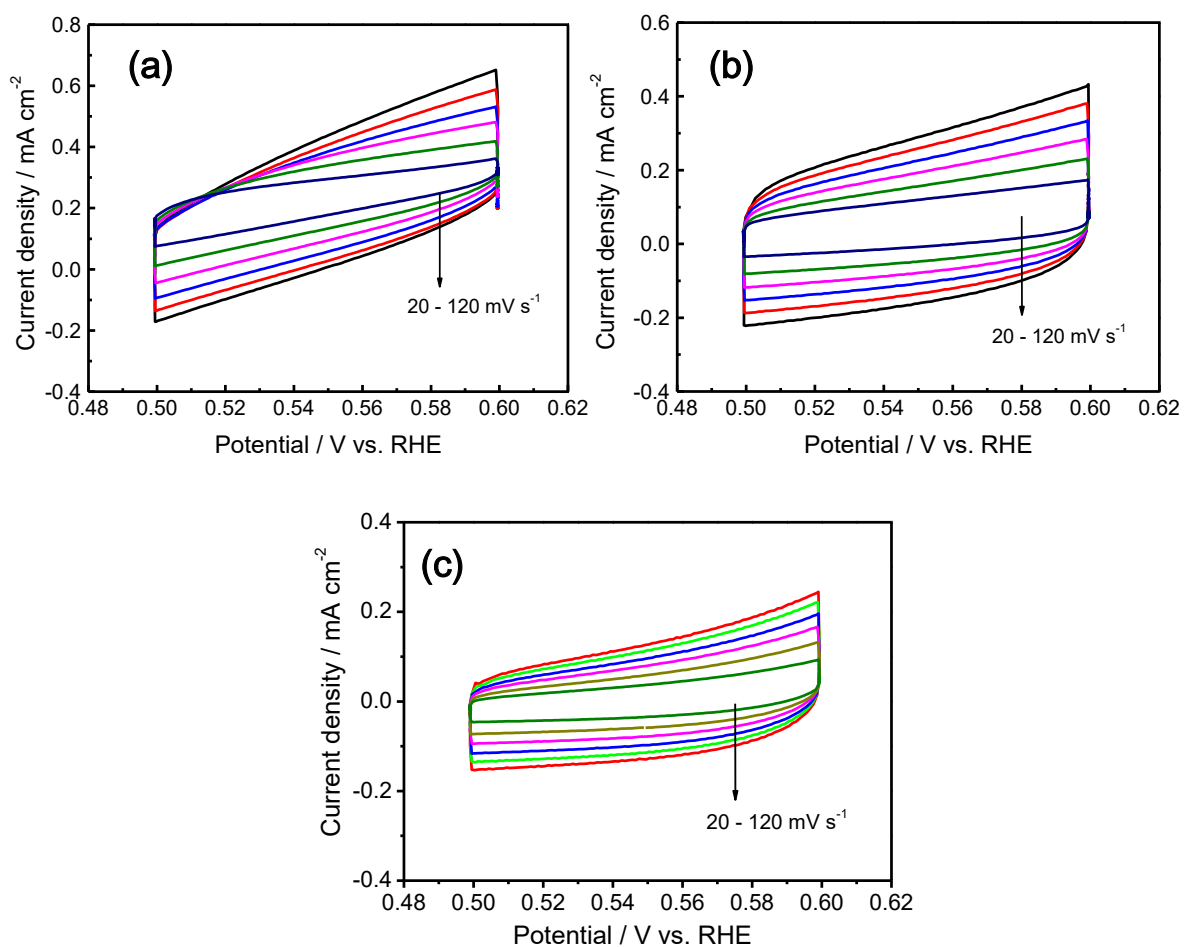

**Figure S15.** CV curves recorded in 1M KOH at different scan rates in the region of 0.5~0.6 V vs. RHE for (a) CoMo/CoMoO<sub>x</sub>@C, (b) CoMo/CoMoO<sub>x</sub> and (c) CoMo.

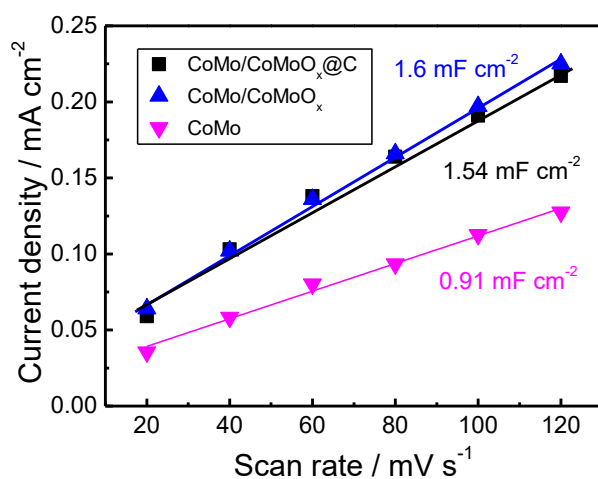

**Figure S16.** Plots showing the extraction of the electrochemical double layer capacitance (C<sub>dl</sub>).

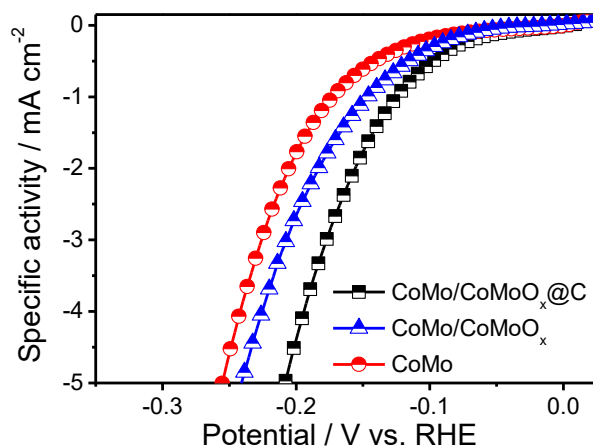

**Figure S17.** Specific activity obtained from the normalization of the HER current by the ECSA.

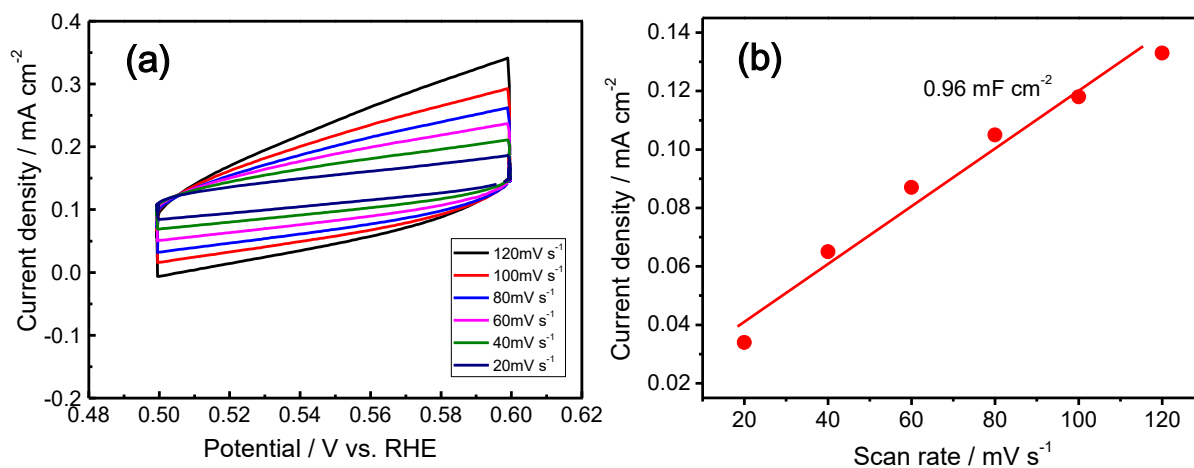

**Figure S18.** (a) CV curves for heat-treated CoMo/CoMoO<sub>x</sub>@C (100°C for 12 hours), and (b) the extraction of the electrochemical double layer capacitance (C<sub>dl</sub>). Solution: 1M KOH.

The C<sub>dl</sub> was 0.96 mF cm<sup>-2</sup> for CoMo/CoMoO<sub>x</sub>@C after the heat treatment at 100 °C.

The ECSA was 24 cm<sup>2</sup> assuming that the specific capacitance of a planar surface was 40 μF cm<sup>-2</sup>.

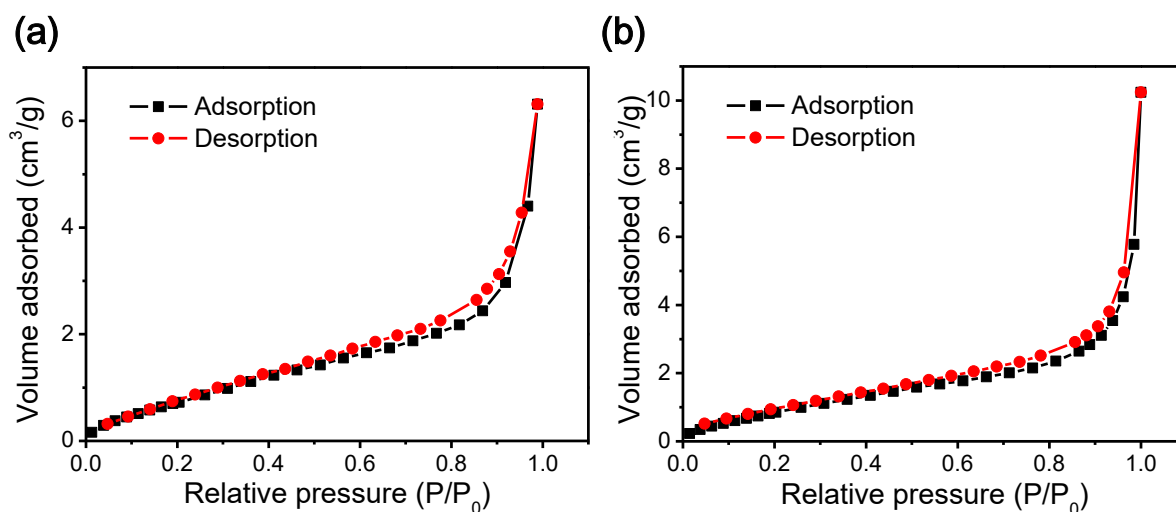

**Figure S19.** The Brunauer-Emmett-Teller (BET) isotherms for (a) as-prepared and (b) heat-treated CoMo/CoMoO<sub>x</sub>@C (100°C for 12 hours).

The overall isotherm of both materials can be identified as type IV according to the IUPAC classification. The BET surface area was 3.72 and 3.86 m<sup>2</sup> g<sup>-1</sup> for as-prepared and heat-treated CoMo/CoMoO<sub>x</sub>@C, respectively. The small surface area was attributed to the wrapping of nanoparticles by carbon layer.

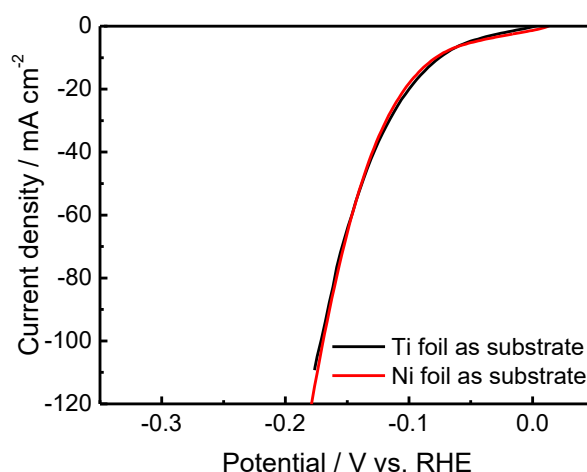

**Figure S20.** The iR-corrected linear sweep voltammetry (LSV) curves of CoMo/CoMoO<sub>x</sub>@C prepared on different substrates. Scan rate: 5 mV s<sup>-1</sup>. Solution: 1M KOH.

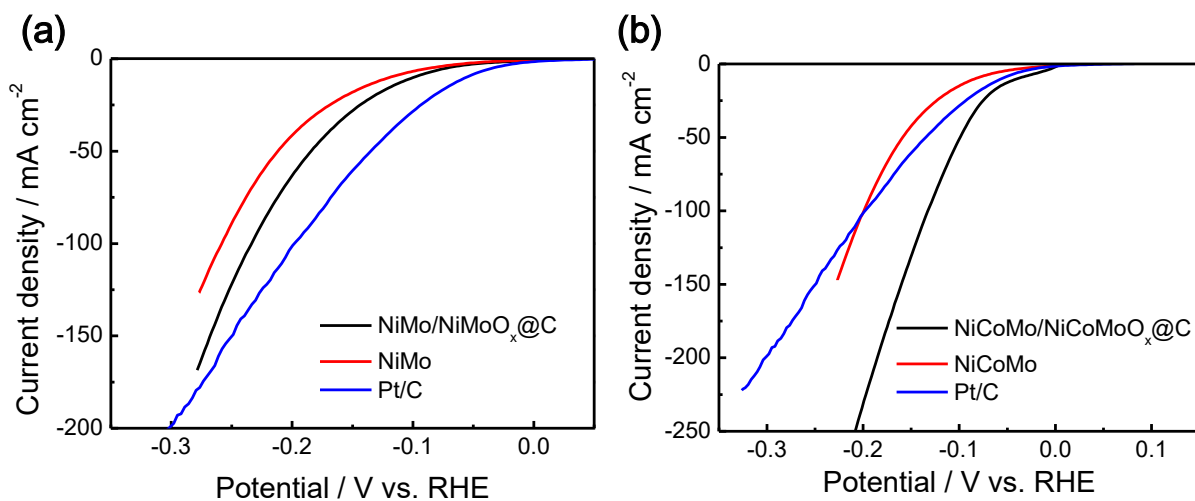

**Figure S21.** The iR-corrected LSV curves of (a) NiMo/NiMoO<sub>x</sub>@C and NiMo, and (b) NiCoMo/NiCoMoO<sub>x</sub>@C and NiCoMo. Scan rate: 5 mV s<sup>-1</sup>. Solution: 1M KOH.

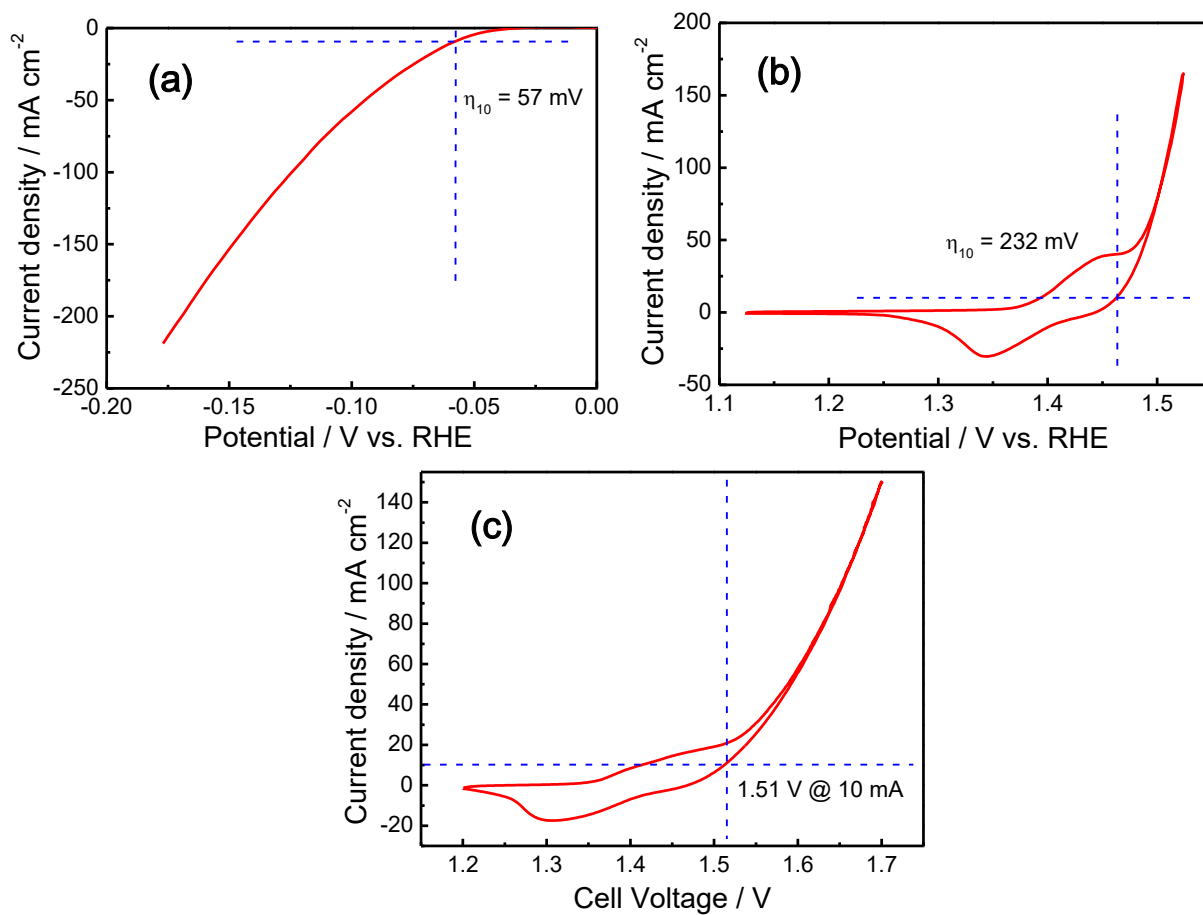

**Figure S22.** The iR-corrected electrocatalytic measurements of NiFeMo/NiFeMoO<sub>x</sub> in 1 M KOH. (a) LSV, (b) CV, and (c) the overall water splitting. Scan rate: 5 mV s<sup>-1</sup>.

**Table S1.** Performance comparison between CoMo/CoMoO<sub>x</sub>@C and recently reported non- precious HER catalysts.

| Material                                                            | Solution | Current collector        | $\eta_{10}$ (mV)               | Tafel slope (mV dec <sup>-1</sup> ) | Reference                 |
|---------------------------------------------------------------------|----------|--------------------------|--------------------------------|-------------------------------------|---------------------------|
| CoMo/CoMoO <sub>x</sub> @C                                          | 1M KOH   | Planar, copper foil      | 76                             | 75.2                                | This work                 |
| FeCo/Co <sub>2</sub> P@NP CF <sup>1</sup>                           | 1M KOH   | Glassy carbon            | 260                            | 120                                 | Adv. Energy. Mater. 2020  |
| CoMn/CoMn <sub>2</sub> O <sub>4</sub> <sup>2</sup>                  | 1M KOH   | 3D, nickel foam          | 69                             | 90                                  | Adv. Funct. Mater. 2020   |
| Co@N-CNTs@rGO <sup>3</sup>                                          | 1M KOH   | Glassy carbon            | 108                            | 55                                  | Adv. Mater. 2018          |
| C-Ni <sub>1-x</sub> O <sup>4</sup>                                  | 1M KOH   | Nickel foam              | 27                             | 36                                  | Nat. Commun. 2020         |
| LSC&MoSe <sub>2</sub> <sup>5</sup>                                  | 1M KOH   | Glassy carbon            | >200                           | 34                                  | Nat. Commun. 2019         |
| Ni-CoP/HPFs <sup>6</sup>                                            | 1M KOH   | Glassy carbon            | 92                             | 71                                  | Nano Energy 2019          |
| Ni-N <sub>x</sub> -C <sup>7</sup>                                   | 1M KOH   | Exfoliated graphene foil | 147                            | 114                                 | Energy Environ. Sci. 2019 |
| NiCoS@HsGD Y@Ni,Co-MoS <sub>2</sub> <sup>8</sup>                    | 1M KOH   | Carbon paper             | 100                            | 89.5                                | Nat. Commun. 2019         |
| Zn <sub>0.08</sub> Co <sub>0.92</sub> P nanowall array <sup>9</sup> | 1M KOH   | Titanium mesh            | 67                             | 39                                  | Adv. Energy Mater. 2017   |
| NiCoP/rGO <sup>10</sup>                                             | 1M KOH   | Carbon paper             | 209                            | 124.1                               | Adv. Funct. Mater. 2016   |
| CoO <sub>x</sub> @CN <sup>11</sup>                                  | 1M KOH   | Glassy carbon            | 232                            | N. A.                               | J. Am. Chem. Soc. 2015    |
| MoNi <sub>4</sub> <sup>12</sup>                                     | 1M KOH   | Nickel foam              | 15                             | 30                                  | Nat. Commun. 2017         |
| MoS <sub>2</sub> /Ni <sub>3</sub> S <sub>2</sub> <sup>13</sup>      | 1M KOH   | Nickel foam              | 110                            | 83                                  | Angew. Chem. 2016         |
| sc-Ni <sub>2</sub> P /NiHO <sup>14</sup>                            | 1M KOH   | Nickel foam              | 60                             | 75                                  | Angew. Chem. 2019         |
| o-CoSe <sub>2</sub> ]P <sup>15</sup>                                | 1M KOH   | Glassy carbon            | 104                            | 69                                  | Nat. Commun. 2018         |
| Ni/NiO <sup>16</sup>                                                | 1M NaOH  | Nickel foam              | 46 mV @ 20 mA cm <sup>-2</sup> | 65                                  | J. Mater. Chem. A 2016    |

|                                                                 |                                     |                |                                  |      |                        |
|-----------------------------------------------------------------|-------------------------------------|----------------|----------------------------------|------|------------------------|
| NiO/Ni-CNT <sup>17</sup>                                        | 1M KOH                              | Glassy carbon  | 80                               | 82   | Nat. Commun. 2014      |
| Iron-nickel sulfide ultrathin nanosheets <sup>18</sup>          | 0.5M H <sub>2</sub> SO <sub>4</sub> | Glassy carbon  | 105                              | 40   | J. Am. Chem. Soc. 2015 |
| Mo-doped Ni <sub>3</sub> S <sub>2</sub> nano-rods <sup>19</sup> | 1M KOH                              | Nickel foam    | 278 mV @ 100 mA cm <sup>-2</sup> | 72.9 | J. Mater. Chem. A 2017 |
| NiMo hollow nanorod <sup>20</sup>                               | 1M KOH                              | Ti mesh        | 92                               | 76   | J. Mater. Chem. A 2015 |
| NiMo <sub>3</sub> S <sub>4</sub> /CTs <sup>21</sup>             | 0.5M H <sub>2</sub> SO <sub>4</sub> | Carbon textile | 156                              | 46.2 | Nano Energy 2018       |
| Ni <sub>3</sub> FeN/r-GO <sup>22</sup>                          | 1M KOH                              | Nickel foam    | 94                               | 90   | ACS Nano 2018          |

**Table S2.** Elemental percentage of CoMo/CoMoO<sub>x</sub> before and after stability test.

| Elements | Before test / wt.% | After test / wt.% |
|----------|--------------------|-------------------|
| O        | 10.9               | 1.1               |
| Co       | 69.9               | 85.6              |
| Mo       | 19.2               | 13.3              |

**Table S3.** Electrical elements fitted by the equivalent circuit in Figure S14.

|                            | R <sub>s</sub> / Ω | CPE <sub>1</sub> / mF | R <sub>ad</sub> / Ω | CPE <sub>2</sub> / mF | R <sub>ct</sub> / Ω |
|----------------------------|--------------------|-----------------------|---------------------|-----------------------|---------------------|
| CoMo/CoMoO <sub>x</sub> @C | 2.10               | 523                   | 0.88                | 730                   | 1.80                |
| CoMo/CoMoO <sub>x</sub>    | 2.39               | 630                   | 0.92                | 715                   | 5.88                |
| CoMo                       | 2.45               | 490                   | 1.43                | 720                   | 20.81               |

**Table S4.** Comparison of overall water splitting performance between NiFeMo/NiFeMoO<sub>x</sub> and recently reported catalysts.

| Material                                                               | Solution | Current collector   | Potential @ 10mA/cm <sup>2</sup> | Reference                   |
|------------------------------------------------------------------------|----------|---------------------|----------------------------------|-----------------------------|
| NiFeMo/NiFeMoO <sub>x</sub>                                            | 1M KOH   | Planar, copper foil | 1.51                             | <b>This work</b>            |
| LSC&MoSe <sub>2</sub> <sup>5</sup>                                     | 1M KOH   | Ni mesh             | 2.3V @ 100 mA/cm <sup>2</sup>    | Nat. Commun. 2019           |
| CoFeZr oxides nanosheets <sup>23</sup>                                 | 1M KOH   | 3D, Ni foam         | 1.63                             | Adv. Mater. 2019            |
| FeCo/Co <sub>2</sub> P@NPCF <sup>1</sup>                               | 1M KOH   | Carbon paper        | 1.68                             | Adv. Energy. Mater. 2020    |
| Ni NP/Ni-N-C <sup>7</sup>                                              | 1M KOH   | Graphite foil       | 1.58                             | Energy & Environ. Sci. 2019 |
| NC-NiCu-NiCuN <sup>24</sup>                                            | 1M KOH   | 3D, nickel foam     | 1.56                             | Adv. Funct. Mater. 2018     |
| O-CoMoS <sup>25</sup>                                                  | 1M KOH   | Carbon fiber cloth  | 1.6                              | ACS Catalysis 2018          |
| Ni <sub>3</sub> FeN/r-GO <sup>22</sup>                                 | 1M KOH   | 3D, Ni foam         | 1.6                              | ACS Nano 2018               |
| Pt-CoS <sub>2</sub> /CC <sup>26</sup>                                  | 1M KOH   | Carbon cloth        | 1.55                             | Adv. Energy Mater. 2018     |
| NiCoP/rGO <sup>10</sup>                                                | 1M KOH   | Carbon fiber paper  | 1.59                             | Adv. Funct. Mater. 2016     |
| NiFe LDH@NiCoP/NF <sup>27</sup>                                        | 1M KOH   | 3D, Ni foam         | 1.57                             | Adv. Funct. Mater. 2018     |
| Fe <sub>0.09</sub> Co <sub>0.13</sub> -NiSe <sub>2</sub> <sup>28</sup> | 1M KOH   | Carbon fiber cloth  | 1.52                             | Adv. Mater. 2018            |
| Ni <sub>2</sub> P@NiFe hydroxide <sup>29</sup>                         | 1M KOH   | 3D, Ni foam         | 1.51                             | Chem. Sci. 2018             |
| Ni-Fe NP <sup>30</sup>                                                 | 1M KOH   | 3D, Ni foam         | 1.47                             | Nat. Commun. 2019           |
| Ni <sub>2</sub> Fe <sub>1</sub> -Mo <sup>31</sup>                      | 1M KOH   | 3D, Ni foam         | 1.66                             | J. Mater. Chem. A 2018      |
| EG/Co <sub>0.85</sub> Se/NiFe LDH <sup>32</sup>                        | 1M KOH   | Graphite foil       | 1.67                             | Energy & Environ. Sci. 2016 |
| V-CoP@a-CeO <sub>2</sub> <sup>33</sup>                                 | 1M KOH   | Carbon cloth        | 1.56                             | Adv. Funct. Mater. 2020     |

## REFERENCES

1. Q. Shi, Q. Liu, Y. Ma, Z. Fang, Z. Liang, G. Shao, B. Tang, W. Yang, L. Qin and X. Fang, *Adv. Energy Mater.*, 2020, **10**, 1903854.
2. C. Wang, H. Lu, Z. Mao, C. Yan, G. Shen and X. Wang, *Adv. Funct. Mater.*, 2020, **30**, 2000556.
3. Z. Chen, R. Wu, Y. Liu, Y. Ha, Y. Guo, D. Sun, M. Liu and F. Fang, *Adv. Mater.*, 2018, **30**, 1802011.
4. T. Kou, M. Chen, F. Wu, T. J. Smart, S. Wang, Y. Wu, Y. Zhang, S. Li, S. Lall, Z. Zhang, Y.-S. Liu, J. Guo, G. Wang, Y. Ping and Y. Li, *Nat. Commun.*, 2020, **11**, 590.
5. N. K. Oh, C. Kim, J. Lee, O. Kwon, Y. Choi, G. Y. Jung, H. Y. Lim, S. K. Kwak, G. Kim and H. Park, *Nat. Commun.*, 2019, **10**, 1723.
6. Y. Pan, K. Sun, Y. Lin, X. Cao, Y. Cheng, S. Liu, L. Zeng, W.-C. Cheong, D. Zhao, K. Wu, Z. Liu, Y. Liu, D. Wang, Q. Peng, C. Chen and Y. Li, *Nano Energy*, 2019, **56**, 411-419.
7. C. Lei, Y. Wang, Y. Hou, P. Liu, J. Yang, T. Zhang, X. Zhuang, M. Chen, B. Yang, L. Lei, C. Yuan, M. Qiu and X. Feng, *Energy Environ. Sci.*, 2019, **12**, 149-156.
8. S. Zhuo, Y. Shi, L. Liu, R. Li, L. Shi, D. H. Anjum, Y. Han and P. Wang, *Nat. Commun.*, 2018, **9**, 3132.
9. T. Liu, D. Liu, F. Qu, D. Wang, L. Zhang, R. Ge, S. Hao, Y. Ma, G. Du, A. M. Asiri, L. Chen and X. Sun, *Adv. Energy Mater.*, 2017, **7**, 1700020.
10. L. Jiayuan, Y. Ming, Z. Xuemei, H. Zheng-Qing, X. Zhaoming, C. Chun-Ran, M. Yuanyuan and Q. Yongquan, *Adv. Funct. Mater.*, 2016, **26**, 6785-6796.
11. H. Jin, J. Wang, D. Su, Z. Wei, Z. Pang and Y. Wang, *J. Am. Chem. Soc.*, 2015, **137**, 2688-2694.
12. J. Zhang, T. Wang, P. Liu, Z. Liao, S. Liu, X. Zhuang, M. Chen, E. Zschech and X. Feng, *Nat. Commun.*, 2017, **8**, 15437.
13. J. Zhang, T. Wang, D. Pohl, B. Rellinghaus, R. Dong, S. Liu, X. Zhuang and X. Feng, *Angew. Chem.*, 2016, **128**, 6814-6819.
14. B. You, Y. Zhang, Y. Jiao, k. Davey and S. Qiao, *Angew. Chem. Int. Edit.*, 2019, **58**, 11796-11800.
15. Y.-R. Zheng, P. Wu, M.-R. Gao, X.-L. Zhang, F.-Y. Gao, H.-X. Ju, R. Wu, Q. Gao, R. You, W.-X. Huang, S.-J. Liu, S.-W. Hu, J. Zhu, Z. Li and S.-H. Yu, *Nat. Commun.*, 2018, **9**, 2533.
16. X. Liu, X. Wang, X. Yuan, W. Dong and F. Huang, *J. Mater. Chem. A*, 2016, **4**, 167-172.
17. M. Gong, W. Zhou, M.-C. Tsai, J. Zhou, M. Guan, M.-C. Lin, B. Zhang, Y. Hu, D.-Y. Wang, J. Yang, S. J. Pennycook, B.-J. Hwang and H. Dai, *Nat. Commun.*, 2014, **5**, 4695.
18. X. Long, G. Li, Z. Wang, H. Zhu, T. Zhang, S. Xiao, W. Guo and S. Yang, *J. Am. Chem. Soc.*, 2015, **137**, 11900-11903.
19. Z. Cui, Y. Ge, H. Chu, R. Baines, P. Dong, J. Tang, Y. Yang, P. M. Ajayan, M.



- Ye and J. Shen, *J. Mater. Chem. A*, 2017, **5**, 1595-1602.
20. J. Tian, N. Cheng, Q. Liu, X. Sun, Y. He and A. M. Asiri, *J. Mater. Chem. A*, 2015, **3**, 20056-20059.
  21. D. Kong, Y. Wang, Y. V. Lim, S. Huang, J. Zhang, B. Liu, T. Chen and H. Y. Yang, *Nano Energy*, 2018, **49**, 460-470.
  22. Y. Gu, S. Chen, J. Ren, Y. A. Jia, C. Chen, S. Komarneni, D. Yang and X. Yao, *ACS Nano*, 2018, **12**, 245-253.
  23. L. Huang, D. Chen, G. Luo, Y.-R. Lu, C. Chen, Y. Zou, C.-L. Dong, Y. Li and S. Wang, *Adv. Mater.*, 2019, **31**, 1901439.
  24. J. Hou, Y. Sun, Z. Li, B. Zhang, S. Cao, Y. Wu, Z. Gao and L. Sun, *Adv. Funct. Mater.*, 2018, **28**, 1803278.
  25. J. Hou, B. Zhang, Z. Li, S. Cao, Y. Sun, Y. Wu, Z. Gao and L. Sun, *ACS Catal.*, 2018, **8**, 4612-4621.
  26. X. Han, X. Wu, Y. Deng, J. Liu, J. Lu, C. Zhong and W. Hu, *Adv. Energy Mater.*, 2018, **8**, 1800935.
  27. H. Zhang, X. Li, A. Hähnel, V. Naumann, C. Lin, S. Azimi, S. L. Schweizer, A. W. Maijenburg and R. B. Wehrspohn, *Adv. Funct. Mater.*, 2018, **28**, 1706847.
  28. Y. Sun, K. Xu, Z. Wei, H. Li, T. Zhang, X. Li, W. Cai, J. Ma, H. J. Fan and Y. Li, *Adv. Mater.*, 2018, **30**, 1802121.
  29. F.-S. Zhang, J.-W. Wang, J. Luo, R.-R. Liu, Z.-M. Zhang, C.-T. He and T.-B. Lu, *Chem. Sci.*, 2018, **9**, 1375-1384.
  30. B. H. R. Suryanto, Y. Wang, R. K. Hocking, W. Adamson and C. Zhao, *Nat. Commun.*, 2019, **10**, 5599.
  31. Y. Chen, C. Dong, J. Zhang, C. Zhang and Z. Zhang, *J. Mater. Chem. A*, 2018, **6**, 8430-8440.
  32. Y. Hou, M. R. Lohe, J. Zhang, S. Liu, X. Zhuang and X. Feng, *Energy Environ. Sci.*, 2016, **9**, 478-483.
  33. L. Yang, R. Liu and L. Jiao, *Adv. Funct. Mater.*, 2020, **30**, 1909618.
